# Supplementary material
Source: PubMed Central journal article supplement (PMC6855377)
Supplement: NIHMS1057192-supplement-Supplemental_material.pdf [file NIHMS1057192-supplement-Supplemental_material.pdf]

## Survey of infection prevention informatics use and practitioner satisfaction in U.S. hospitals

Corresponding author: [Anthony D Harris, MD, MPH](mailto:aharris@epi.umaryland.edu) <aharris@epi.umaryland.edu>

**1. Are you the:**

- Hospital epidemiologist
- Infection preventionist

**2. What computer physician order entry system (CPOE) do you use?**

- Cerner
- Epic
- McKesson
- GE
- Other (please specify): \_\_\_\_\_

**3. Which, if any, infection control/hospital epidemiology/antimicrobial stewardship software do you use on top of your CPOE system?**

- We have no additional software or we only use internal IT resources
- Thera-Doc (Hospira)
- Medmined (Cardinal)
- Safety Surveillor (Premier)
- Senti-7
- Other (please specify): \_\_\_\_\_

*If Thera-Doc, Medmined, Safety Surveillor, or Senti-7, continue to next page. Otherwise, skip to page 7.*











**22. Have you built a home-grown system relative to infection control needs to supplement your CPOE?**

Yes

No

*If yes, skip to page 9. If no, go to next page.*

**23. What is your satisfaction with [Q2] in terms of meeting your infection control needs?**

1     2     3     4     5     6     7     8     9     10  
 ←Not satisfied Most satisfied →

**24. How do you transfer information to CDC/NHSN?**

Through CDC software.  
 Through home-grown software  
 Other (please specify): \_\_\_\_\_

**25. How easy is to transfer information to CDC/NHSN?**

1     2     3     4     5     6     7     8     9     10  
 ←Difficult Easy →

**26. The reason I have not purchased additional infection control software is:**  
*(select all that apply)*

Cost  
 No requirement needs  
 My IT would not support the product  
 Other (please specify): \_\_\_\_\_

**27. What is your satisfaction with [Q2] in terms of meeting your antibiotic stewardship needs?**

1     2     3     4     5     6     7     8     9     10  
 ←Not satisfied Most satisfied →

**28. How likely are you to continue using [Q2] for infection control/hospital epidemiology/ antimicrobial stewardship 2 years from now?**

1     2     3     4     5     6     7     8     9     10  
 ←Not satisfied Most satisfied →

Skip to page 10.



**29. What is your satisfaction with your custom-built system in terms of meeting your infection control needs?**

1     2     3     4     5     6     7     8     9     10  
 ← Not satisfied Most satisfied →

**30. How do you transfer information to CDC/NHSN?**

Through CDC software.  
 Through home-grown software  
 Other (please specify): \_\_\_\_\_

**31. How easy is to transfer information to CDC/NHSN?**

1     2     3     4     5     6     7     8     9     10  
 ← Difficult Easy →

**32. The reason I have not purchased additional infection control software is: (select all that apply)**

Cost  
 No requirement needs  
 My IT would not support the product  
 Other (please specify): \_\_\_\_\_

**33. What is your satisfaction with your custom-built system in terms of meeting your antibiotic stewardship needs?**

1     2     3     4     5     6     7     8     9     10  
 ← Not satisfied Most satisfied →

**34. How likely are you to continue using your custom-built system for infection control/hospital epidemiology/antimicrobial stewardship 2 years from now?**

1     2     3     4     5     6     7     8     9     10  
 ← Not satisfied Most satisfied →

**35. Is there anything else about your infection control software you would tell someone who was thinking about using it?**

**(E.g.: Any specific highlights or difficulties with your software? Are there discrepancies between capabilities your vendor says are included and your experience with the software?)**
